# Supplementary material
Source: Royal Society of Chemistry journal article supplement (doi:10.1039/d5ew01049g)
Supplement: d5ew01049g1.xlsx [file d5ew01049g1.xlsx]

## Sheet: Table S1
Year	Author	Title	DOI
2022	Acer, P. T., et al.	Quantifying the Relationship between SARS-CoV-2 Wastewater Concentrations and Building-Level COVID-19 Prevalence at an Isolation Residence: A Passive Sampling Approach	10.3390/ijerph191811245
2021	Acosta, N., et al.	A multicenter study investigating SARS-CoV-2 in tertiary-care hospital wastewater. viral burden correlates with increasing hospitalized cases as well as hospital-associated transmissions and outbreaks	10.1016/j.watres.2021.117369
2022	Acosta, N., et al.	Longitudinal SARS-CoV-2 RNA wastewater monitoring across a range of scales correlates with total and regional COVID-19 burden in a well-defined urban population	10.1016/j.watres.2022.118611
2021	Agrawal, S., et al.	Long-term monitoring of SARS-CoV-2 RNA in wastewater of the Frankfurt metropolitan area in Southern Germany	10.1038/s41598-021-84914-2
2023	Ahmed, W., et al.	Occurrence of multiple respiratory viruses in wastewater in Queensland, Australia: Potential for community disease surveillance	10.1016/j.scitotenv.2022.161023
2021	Al-Duroobi, H., et al.	Wastewater surveillance of SARS-CoV-2 corroborates heightened community infection during the initial peak of COVID-19 in Bexar County, Texas	10.1093/femsmc/xtab015
2021	Albastaki, A., et al.	First confirmed detection of SARS-COV-2 in untreated municipal and aircraft wastewater in Dubai, UAE: The use of wastewater based epidemiology as an early warning tool to monitor the prevalence of COVID-19	10.1016/j.scitotenv.2020.143350
2022	Amereh, F., et al.	Association of SARS-CoV-2 presence in sewage with public adherence to precautionary measures and reported COVID-19 prevalence in Tehran	10.1016/j.scitotenv.2021.152597
2023	Ando, H., et al.	Impact of the COVID-19 pandemic on the prevalence of influenza A and respiratory syncytial viruses elucidated by wastewater-based epidemiology	10.1016/j.scitotenv.2023.162694
2023	Ando, H., et al.	Wastewater-based prediction of COVID-19 cases using a highly sensitive SARS-CoV-2 RNA detection method combined with mathematical modeling	10.1016/j.envint.2023.107743
2022	Annesser, E., et al.	Modeling the relationship between SARS-CoV-2 RNA in wastewater or sludge and COVID-19 cases in three New England regions	10.2166/wh.2022.013
2023	Asadi, M., et al.	A wastewater-based risk index for SARS-CoV-2 infections among three cities on the Canadian Prairie	10.1016/j.scitotenv.2023.162800
2023	Asadi, M., et al.	Assessment of rapid wastewater surveillance for determination of communicable disease spread in municipalities	10.1016/j.scitotenv.2023.166541
2023	Ash, K. T., et al.	SARS-CoV-2 raw wastewater surveillance from student residences on an urban university campus	10.3389/fmicb.2023.1101205
2023	Ashraf, M. A., et al.	Temporal study of wastewater surveillance from September 2020 to March 2021: an estimation of COVID-19 patients in Lahore, Pakistan	10.1007/s11356-023-28041-7
2022	Bagutti, C., et al.	Wastewater monitoring of SARS-CoV-2 shows high correlation with COVID-19 case numbers and allowed early detection of the first confirmed B.1.1.529 infection in Switzerland: results of an observational surveillance study	10.4414/smw.2022.w30202
2023	Baldovin, T., et al.	Trends in SARS-CoV-2 clinically confirmed cases and viral load in wastewater: A critical alignment for Padua city (NE Italy)	10.1016/j.heliyon.2023.e20571
2023	Baldwin, W. M., et al.	Highly socially vulnerable communities exhibit disproportionately increased viral loads as measured in community wastewater	10.1016/j.envres.2023.115351
2022	Bar-Or, I., et al.	National Scale Real-Time Surveillance of SARS-CoV-2 Variants Dynamics by Wastewater Monitoring in Israel	10.3390/v14061229
2023	Barber, C., et al.	Community-Scale Wastewater Surveillance of Candida auris during an Ongoing Outbreak in Southern Nevada	10.1021/acs.est.2c07763
2022	Barbosa, M. R. F., et al.	One-year surveillance of SARS-CoV-2 in wastewater from vulnerable urban communities in metropolitan São Paulo, Brazil	10.2166/wh.2022.210
2023	Barrio, A., et al.	Detection of SARS-CoV-2 in wastewater as an early warning in the metropolitan area of the city of Buenos Aires (BAMA)	10.1080/23863781.2023.2241637
2021	Barrios, M. E., et al.	Dynamics of SARS-CoV-2 in wastewater in three districts of the Buenos Aires metropolitan region, Argentina, throughout nine months of surveillance: A pilot study	10.1016/j.scitotenv.2021.149578
2021	Barrios, R. E., et al.	SARS-CoV-2 concentrations in a wastewater collection system indicated potential COVID-19 hotspots at the zip code level	10.1016/j.scitotenv.2021.149480
2022	Barua, V. B., et al.	Tracking the temporal variation of COVID-19 surges through wastewater-based epidemiology during the peak of the pandemic: A six-month long study in Charlotte, North Carolina	10.1016/j.scitotenv.2021.152503
2023	Belmonte-Lopes, R., et al.	20-Month monitoring of SARS-CoV-2 in wastewater of Curitiba, in Southern Brazil	10.1007/s11356-023-27926-x
2023	Bertels, X., et al.	Time series modelling for wastewater-based epidemiology of COVID-19: A nationwide study in 40 wastewater treatment plants of Belgium, February 2021 to June 2022	10.1016/j.scitotenv.2023.165603
2022	Bitter, L. C., et al.	Wastewater Surveillance of SARS-CoV-2 at a Canadian University Campus and the Impact of Wastewater Characteristics on Viral RNA Detection	10.1021/acsestwater.2c00060
2021	Bivins, A.; Bibby, K.	Wastewater Surveillance during Mass COVID-19 Vaccination on a College Campus	10.1021/acs.estlett.1c00519
2023	Boehm, A. B., et al.	More than a Tripledemic: Influenza A Virus, Respiratory Syncytial Virus, SARS-CoV-2, and Human Metapneumovirus in Wastewater during Winter 2022-2023	10.1021/acs.estlett.3c00385
2023	Boehm, A. B., et al.	Wastewater concentrations of human influenza, metapneumovirus, parainfluenza, respiratory syncytial virus, rhinovirus, and seasonal coronavirus nucleic-acids during the COVID-19 pandemic: a surveillance study	10.1016/S2666-5247(22)00386-X
2022	Boeras, I., et al.	Anthropogenic Sewage Water Circuit as Vector for SARS-CoV-2 Viral ARN Transport and Public Health Assessment, Monitoring and Forecasting-Sibiu Metropolitan Area (Transylvania/Romania) Study Case	10.3390/ijerph191811725
2023	Bowes, D. A., et al.	Leveraging an established neighbourhood-level, open access wastewater monitoring network to address public health priorities: a population-based study	10.1016/s2666-5247(22)00289-0
2023	Brighton, K., et al.	Targeted community wastewater surveillance for SARS-CoV-2 and Mpox virus during a festival mass-gathering event	10.1016/j.scitotenv.2023.167443
2017	Brinkman, N. E., et al.	Retrospective Surveillance of Wastewater To Examine Seasonal Dynamics of Enterovirus Infections	10.1128/mSphere.00099-17
2021	Brooks, Y. M., et al.	Detection of SARS-CoV-2 in Wastewater at Residential College, Maine, USA, August-November 2020	10.3201/eid2712.211199
2023	Brooks, Y., et al.	A case study of a community-organized wastewater surveillance in a small community: correlating weekly reported COVID-19 cases with SARS-CoV-2 RNA concentrations, fall 2020 to summer 2021 in Yarmouth, ME	10.2166/wh.2023.238
2021	Carcereny, A., et al.	Monitoring Emergence of the SARS-CoV-2 B.1.1.7 Variant through the Spanish National SARS-CoV-2 Wastewater Surveillance System (VATar COVID-19)	10.1021/acs.est.1c03589
2021	Carrillo-Reyes, J., et al.	Surveillance of SARS-CoV-2 in sewage and wastewater treatment plants in Mexico	10.1016/j.jwpe.2020.101815
2022	Castiglioni, S., et al.	SARS-CoV-2 RNA in urban wastewater samples to monitor the COVID-19 pandemic in Lombardy, Italy (March-June 2020)	10.1016/j.scitotenv.2021.150816
2023	Chua, F. J. D., et al.	Co-incidence of BA.1 and BA.2 at the start of Singapore's Omicron wave revealed by Community and University Campus wastewater surveillance	10.1016/j.scitotenv.2023.162611
2021	Claro, I. C. M., et al.	Long-term monitoring of SARS-COV-2 RNA in wastewater in Brazil: A more responsive and economical approach	10.1016/j.watres.2021.117534
2022	Cohen, A., et al.	Subsewershed SARS-CoV-2 Wastewater Surveillance and COVID-19 Epidemiology Using Building-Specific Occupancy and Case Data	10.1021/acsestwater.2c00059
2023	Cruz, M. C., et al.	Sewershed surveillance as a tool for smart management of a pandemic in threshold countries. Case study: Tracking SARS-CoV-2 during COVID-19 pandemic in a major urban metropolis in northwestern Argentina	10.1016/j.scitotenv.2022.160573
2022	Cutrupi, F., et al.	The wave of the SARS-CoV-2 Omicron variant resulted in a rapid spike and decline as highlighted by municipal wastewater surveillance	10.1016/j.eti.2022.102667
2021	D'Aoust, P. M., et al.	Catching a resurgence: Increase in SARS-CoV-2 viral RNA identified in wastewater 48 h before COVID-19 clinical tests and 96 h before hospitalizations	10.1016/j.scitotenv.2021.145319
2022	Daigle, J., et al.	A Sensitive and Rapid Wastewater Test for SARS-COV-2 and Its Use for the Early Detection of a Cluster of Cases in a Remote Community	10.1128/aem.01740-21
2022	Daleiden, B., et al.	Wastewater surveillance of SARS-CoV-2 in Austria: development, implementation, and operation of the Tyrolean wastewater monitoring program	10.2166/wh.2022.218
2022	de Araújo, J. C., et al.	Long-term monitoring of SARS-CoV-2 RNA in sewage samples from specific public places and STPs to track COVID-19 spread and identify potential hotspots	10.1016/j.scitotenv.2022.155959
2023	de Araújo, J. C., et al.	Quantification of SARS-CoV-2 in wastewater samples from hospitals treating COVID-19 patients during the first wave of the pandemic in Brazil	10.1016/j.scitotenv.2022.160498
2021	De Giglio, O., et al.	Potential Use of Untreated Wastewater for Assessing COVID-19 Trends in Southern Italy	10.3390/ijerph181910278
2023	de Graaf, M., et al.	Capturing the SARS-CoV-2 infection pyramid within the municipality of Rotterdam using longitudinal sewage surveillance	10.1016/j.scitotenv.2023.163599
2022	de Llanos, R., et al.	Monitoring the evolution of SARS-CoV-2 on a Spanish university campus through wastewater analysis: A pilot project for the reopening strategy	10.1016/j.scitotenv.2022.157370
2023	de Melo, T., et al.	An alternative method for monitoring and interpreting influenza A in communities using wastewater surveillance	10.3389/fpubh.2023.1141136
2022	de Sousa, A. R. V., et al.	"pySewage": a hybrid approach to predict the number of SARS-CoV-2-infected people from wastewater in Brazil	10.1007/s11356-022-20609-z
2023	Dejonge, P. M., et al.	Wastewater Surveillance Data as a Complement to Emergency Department Visit Data forTracking Incidence of Influenza A and Respiratory Syncytial Virus - Wisconsin, August 2022-March 2023	10.6084/m9.figshare.23669271
2023	Dhiyebi, H. A., et al.	Assessment of seasonality and normalization techniques for wastewater-based surveillance in Ontario, Canada	10.3389/fpubh.2023.1186525
2023	dos Santos, M. M., et al.	Evaluation of wastewater-based epidemiology of COVID-19 approaches in Singapore's closed-system' scenario: A long-term country-wide assessment	10.1016/j.watres.2023.120406
2022	Duvallet, C., et al.	Nationwide Trends in COVID-19 Cases and SARS-CoV-2 RNA Wastewater Concentrations in the United States	10.1021/acsestwater.1c00434
2022	El-Malah, S. S., et al.	Application of human RNase P normalization for the realistic estimation of SARS-CoV-2 viral load in wastewater: A perspective from Qatar wastewater surveillance	10.1016/j.eti.2022.102775
2022	Erster, O., et al.	Monitoring of Enterovirus D68 Outbreak in Israel by a Parallel Clinical and Wastewater Based Surveillance	10.3390/v14051010
2022	Fahrenfeld, N. L., et al.	Year-long wastewater monitoring for SARS-CoV-2 signals in combined and separate sanitary sewers	10.1002/wer.10768
2021	Feng, S. C., et al.	Evaluation of Sampling, Analysis, and Normalization Methods for SARS-CoV-2 Concentrations in Wastewater to Assess COVID-19 Burdens in Wisconsin Communities	10.1021/acsestwater.1c00160
2021	Fitzgerald, S. F., et al.	Site Specific Relationships between COVID-19 Cases and SARS-CoV-2 Viral Load in Wastewater Treatment Plant Influent	10.1021/acs.est.1c05029
2023	Flood, M. T., et al.	Understanding the efficacy of wastewater surveillance for SARS-CoV-2 in two diverse communities	10.1371/journal.pone.0289343
2021	Gerrity, D., et al.	Early-pandemic wastewater surveillance of SARS-CoV-2 in Southern Nevada: Methodology, occurrence, and incidence/prevalence considerations	10.1016/j.wroa.2020.100086
2021	Giraud-Billoud, M., et al.	Monitoring of SARS-CoV-2 RNA in wastewater as an epidemiological surveillance tool in Mendoza, Argentina	10.1016/j.scitotenv.2021.148887
2023	Girón-Guzmán, I., et al.	Spanish wastewater reveals the current spread of Monkeypox virus	10.1016/j.watres.2023.119621
2023	Gitter, A., et al.	Assessment of a SARS-CoV-2 wastewater monitoring program in El Paso, Texas, from November 2020 to June 2022	10.1080/09603123.2022.2159017
2021	González-Reyes, J. R., et al.	Detection of SARS-CoV-2 in Wastewater Northeast of Mexico City: Strategy for Monitoring and Prevalence of COVID-19	10.3390/ijerph18168547
2020	Gonzalez, R., et al.	COVID-19 surveillance in Southeastern Virginia using wastewater-based epidemiology	10.1016/j.watres.2020.116296
2023	Goodwin, J. M., et al.	Designing a Wastewater-Based Epidemiology Study at the U.S. Air Force Academy: Using Severe Acute Respiratory Syndrome Coronavirus 2 to Test a Sentinel System for Early Disease Outbreak Detection	10.1093/milmed/usad239
2021	Greenwald, H. D., et al.	Tools for interpretation of wastewater SARS-CoV-2 temporal and spatial trends demonstrated with data collected in the San Francisco Bay Area	10.1016/j.wroa.2021.100111
2023	Grube, A. M., et al.	Detection of SARS-CoV-2 RNA in wastewater and comparison to COVID-19 cases in two sewersheds, North Carolina, USA	10.10164/j.scitotenv.2022.159996
2022	Gudra, D., et al.	Detection of SARS-CoV-2 RNA in wastewater and importance of population size assessment in smaller cities: An exploratory case study from two municipalities in Latvia	10.1016/j.scitotenv.2022.153775
2023	Haque, R., et al.	Monitoring SARS-CoV-2 variants in wastewater of Dhaka City, Bangladesh: approach to complement public health surveillance systems	10.1186/s40246-023-00505-4
2023	Hasing, M. E., et al.	Wastewater surveillance monitoring of SARS-CoV-2 variants of concern and dynamics of transmission and community burden of COVID-19	10.1080/22221751.2023.2233638
2023	Hassard, F, et al.	Wastewater monitoring for detection of public health markers during the COVID-19 pandemic: Near-source monitoring of schools in England over an academic year	10.1371/journal.pone.0286259
2023	Hayase, S., et al.	Near full-automation of COPMAN using a LabDroid enables high-throughput and sensitive detection of SARS-CoV-2 RNA in wastewater as a leading indicator	10.1016/j.scitotenv.2023.163454
2022	Hegazy, N., et al.	Understanding the dynamic relation between wastewater SARS-CoV-2 signal and clinical metrics throughout the pandemic	10.1016/j.scitotenv.2022.158458
2023	Helm, B., et al.	Regional and temporal differences in the relation between SARS-CoV-2biomarkers in wastewater and estimated infection prevalence-Insightsfrom long-term surveillance br	10.1016/j.scitotenv.2022.159358
2021	Hemalatha, M., et al.	Surveillance of SARS-CoV-2 spread using wastewater-based epidemiology: Comprehensive study	10.1016/j.scitotenv.2020.144704
2022	Herrera-Uribe, J., et al.	Long term detection and quantification of SARS-CoV-2 RNA in wastewater in Bahrain	10.1016/j.hazadv.2022.100082
2021	Hillary, L. S., et al.	Monitoring SARS-CoV-2 in municipal wastewater to evaluate the success of lockdown measures for controlling COVID-19 in the UK	10.1016/j.watres.2021.117214
2022	Ho, J., et al.	SARS-CoV-2 wastewater surveillance in Germany: Long-term RT-digital droplet PCR monitoring, suitability of primer/probe combinations and biomarker stability	10.1016/j.watres.2021.117977
2022	Hoar, C., et al.	Monitoring SARS-CoV-2 in wastewater during New York City's second wave of COVID-19: sewershed-level trends and relationships to publicly available clinical testing data	10.1039/d1ew00747e
2022	Holm, R. H., et al.	SARS-CoV-2 RNA abundance in wastewater as a function of distinct urban sewershed size	10.1039/d1ew00672j
2023	Hopkins, L., et al.	Citywide wastewater SARS-CoV-2 levels strongly correlated with multiple disease surveillance indicators and outcomes over three COVID-19 waves	10.1016/j.scitotenv.2022.158967
2022	Hsu, S. Y., et al.	Biomarkers Selection for Population Normalization in SARS-CoV-2 Wastewater-based Epidemiology	10.1101/2022.03.14.22272359
2021	Huang, Y. N., et al.	Detection of SARS-CoV-2 in wastewater in Halifax, Nova Scotia, Canada, using four RT-qPCR assays	10.1139/facets-2021-0026
2022	Hughes, B., et al.	Respiratory Syncytial Virus (RSV) RNA in Wastewater Settled Solids Reflects RSV Clinical Positivity Rates	10.1021/acs.estlett.1c00963
2022	Hutchison, J. M., et al.	Improving correlation of wastewater SARS-CoV-2 gene copy numbers with COVID-19 public health cases using readily available biomarkers	10.1093/femsmc/xtac010
2023	Ijaz, R., et al.	Detection of BK and JC polyomaviruses in sewage water of the urban areas of Lahore, Pakistan	10.1007/s11756-023-01430-6
2022	Isaksson, F., et al.	Evaluating the Use of Alternative Normalization Approaches on SARS-CoV-2 Concentrations in Wastewater: Experiences from Two Catchments in Northern Sweden	10.3390/environments9030039
2023	Islam, M. A., et al.	A 30-day follow-up study on the prevalence of SARS-COV-2 genetic markers in wastewater from the residence of COVID-19 patient and comparison with clinical positivity	10.1016/j.scitotenv.2022.159350
2022	Janssens, R., et al.	SARS-CoV-2 Surveillance in Belgian Wastewaters	10.3390/v14091950
2023	Jarvie, M. M., et al.	Monitoring of COVID-19 in wastewater across the Eastern Upper Peninsula of Michigan	10.1016/j.envadv.2022.100326
2022	Johnson, R., et al.	Delineating the Spread and Prevalence of SARS-CoV-2 Omicron Sublineages (BA.1-BA.5) and Deltacron Using Wastewater in the Western Cape, South Africa	10.1093/infdis/jiac356
2023	Kagami, K., et al.	Association of wastewater SARS-CoV-2 load with confirmed COVID-19 cases at a university hospital in Sapporo, Japan during the period from February 2021 to February 2023	10.1016/j.scitotenv.2023.165457
2021	Karthikeyan, S., et al.	High-Throughput Wastewater SARS-CoV-2 Detection Enables Forecasting of Community Infection Dynamics in San Diego County	10.1128/mSystems.00045-21
2023	Kim, L. H., et al.	Establishment of wastewater-based SARS-CoV-2 monitoring system over two years: Case studies in South Korea	10.1016/j.jece.2023.110289
2023	Kisand, V.;, et al.	Prediction of COVID-19 positive cases, a nation-wide SARS-CoV-2 wastewater-based epidemiology study	10.1016/j.watres.2023.119617
2023	Klevens, R. M., et al.	Evaluation of wastewater surveillance for SARS-CoV-2 in Massachusetts correctional facilities, 2020-2022	10.3389/frwa.2023.1083316
2023	Koureas, M., et al.	Wastewater Levels of Respiratory Syncytial Virus Associated with Influenza-like Illness Rates in Children-A Case Study in Larissa, Greece (October 2022-January 2023)	10.3390/ijerph20065219
2023	Kumar, M., et al	Early warning of statewide COVID-19 Omicron wave by sentineled urbanized sewer network monitoring using digital PCR in a province capital city, of Gujarat, India	10.1016/j.scitotenv.2023.167060
2023	Kumar, M., et al.	Response of wastewater-based epidemiology predictor for the second wave of COVID-19 in Ahmedabad, India: A long-term data Perspective	10.1016/j.envpol.2023.122471
2021	Kumar, M., et al.	Unravelling the early warning capability of wastewater surveillance for COVID-19: A temporal study on SARS-CoV-2 RNA detection and need for the escalation	10.1016/j.envres.2021.110946
2021	Kumar, M., et al.	Wastewater surveillance-based city zonation for effective COVID-19 pandemic preparedness powered by early warning: A perspectives of temporal variations in SARS-CoV-2-RNA in Ahmedabad, India	10.1016/j.scitotenv.2021.148367
2023	Kumblathan, T., et al.	Quantification and Differentiation of SARS-CoV-2 Variants in Wastewater for Surveillance	10.1021/envhealth.3c00089
2023	Kuroita, T., et al.	Quantitative analysis of SARS-CoV-2 RNA in wastewater and evaluation of sampling frequency during the downward period of a COVID-19 wave in Japan	10.1016/j.scitotenv.2023.166526
2022	Langan, L. M., et al.	Comparative Analysis of RNA-Extraction Approaches and Associated Influences on RT-qPCR of the SARS-CoV-2 RNA in a University Residence Hall and Quarantine Location	10.1021/acsestwater.1c00476
2022	Langan, L. M., et al.	Quantitative Reverse Transcription PCR Surveillance of SARS-CoV-2 Variants of Concern in Wastewater of Two Counties in Texas, United States	10.1021/acsestwater.2c00103
2022	Lastra, A., et al.	SARS-CoV-2 detection in wastewater as an early warning indicator for COVID-19 pandemic. Madrid region case study	10.1016/j.envres.2021.111852
2022	Layton, B. A., et al.	Evaluation of a Wastewater-Based Epidemiological Approach to Estimate the Prevalence of SARS-CoV-2 Infections and the Detection of Viral Variants in Disparate Oregon Communities at City and Neighborhood Scales	10.1289/ehp10289
2021	Lazuka, A., et al.	COVID-19 wastewater based epidemiology: long-term monitoring of 10 WWTP in France reveals the importance of the sampling context	10.2166/wst.2021.418
2023	Lee, J., et al.	Campus node-based wastewater surveillance enables COVID-19 case localization and confirms lower SARS-CoV-2 burden relative to the surrounding community	10.1016/j.watres.2023.120469
2022	Lee, L., et al.	Wastewater surveillance in smaller college communities may aid future public health initiatives	10.1371/journal.pone.0270385
2023	Lekhanya, T., et al.	Measurement of SARS-CoV-2 RNA in wastewater: a case study of the Northern Cape, South Africa	10.2166/wst.2023.197
2022	Li, L., et al.	Longitudinal monitoring of SARS-CoV-2 in wastewater using viral genetic markers and the estimation of unconfirmed COVID-19 cases	10.1016/j.scitotenv.2022.152958
2022	Li, Y., et al.	Surveillance of SARS-CoV-2 in nine neighborhood sewersheds in Detroit Tri-County area, United States: Assessing per capita SARS-CoV-2 estimations and COVID-19 incidence	10.1016/j.scitotenv.2022.158350
2023	Lopez Marin, M. A., et al.	Monitoring COVID-19 spread in selected Prague's schools based on the presence of SARS-CoV-2 RNA in wastewater	10.1016/j.scitotenv.2023.161935
2023	Lott, M. E. J., et al.	Direct wastewater extraction as a simple and effective method for SARS-CoV-2 surveillance and COVID-19 community-level monitoring	10.1093/femsmc/xtad004
2022	Lu, E., et al.	Wastewater surveillance of SARS-CoV-2 in dormitories as a part of comprehensive university campus COVID-19 monitoring	10.1016/j.envres.2022.113580
2022	Lu, Z. C., et al.	Community-Based SARS-CoV-2 Testing Using Saliva or Nasopharyngeal Swabs to Compare the Performance of Weekly COVID-19 Screening to Wastewater SARS-CoV-2 Signals	10.1021/acsestwater.2c00177
2022	Ma, D., et al.	Monitoring SARS-CoV-2 RNA in Wastewater with RT-qPCR and Chip-Based RT-dPCR: Sewershed-Level Trends and Relationships to COVID-19	10.1021/acsestwater.2c00055
2023	Maal-Bared, R., et al.	Does normalization of SARS-CoV-2 concentrations by Pepper Mild Mottle Virus improve correlations and lead time between wastewater surveillance and clinical data in Alberta (Canada): comparing twelve SARS-CoV-2 normalization approaches	10.1016/j.scitotenv.2022.158964
2023	Mahlangeni, N., et al.	Using Wastewater Surveillance to Compare COVID-19 Outbreaks during the Easter Holidays over a 2-Year Period in Cape Town, South Africa	10.3390/v15010162
2023	Maida, C. M., et al.	Wastewater-Based Epidemiology as a Tool to Detect SARS-CoV-2 Circulation at the Community Level: Findings from a One-Year Wastewater Investigation Conducted in Sicily, Italy	10.3390/pathogens12060748
2022	Markt, R., et al.	Detection and abundance of SARS-CoV-2 in wastewater in Liechtenstein, and the estimation of prevalence and impact of the B.1.1.7 variant	10.2166/wh.2021.180
2023	Markt, R., et al.	Expanding the Pathogen Panel in Wastewater Epidemiology to Influenza and Norovirus	10.3390/v15020263
2023	Martin, N. A., et al.	Adeno-Associated Virus 2 and Human Adenovirus F41 in Wastewater during Outbreak of Severe Acute Hepatitis in Children, Ireland	10.3201/eid2904.221878
2022	Martins, R. M., et al.	Long-Term Wastewater Surveillance for SARS-CoV-2: One-Year Study in Brazil	10.3390/v14112333
2022	Masri, N. Z., et al.	Testing specificity and sensitivity of wastewater-based epidemiology for detecting SARS-CoV-2 in four communities on Vancouver Island, Canada	10.1016/j.envadv.2022.100310
2021	McCall, C., et al.	Assessment of enteric viruses during a hepatitis outbreak in Detroit MI using wastewater surveillance and metagenomic analysis	10.1111/jam.15027
2022	McGowan, J., et al.	SARS-CoV-2 Monitoring in Wastewater Reveals Novel Variants and Biomarkers of Infection	10.3390/v14092032
2023	McManus, O., et al.	Predicting COVID-19 Incidence Using Wastewater Surveillance Data, Denmark, October 2021-June 2022	10.3201/eid2908.221634
2022	Mercier, E., et al.	Municipal and neighbourhood level wastewater surveillance and subtyping of an influenza virus outbreak	10.1038/s41598-022-20076-z
2023	Mercier, E., et al.	Wastewater-based surveillance identifies start to the pediatric respiratory syncytial virus season in two cities in Ontario, Canada	10.3389/fpubh.2023.1261165
2022	Mitranescu, A., et al.	Wastewater-Based Epidemiology for SARS-CoV-2 Biomarkers: Evaluation of Normalization Methods in Small and Large Communities in Southern Germany	10.1021/acsestwater.2c00306
2021	Miyani, B., et al.	Early Warnings of COVID-19 Second Wave in Detroit	10.1061/(asce)ee.1943-7870.0001907
2021	Miyani, B., et al.	High abundance of human herpesvirus 8 in wastewater from a large urban area	10.1111/jam.14895
2023	Mohapatra, S., et al.	Wastewater surveillance of SARS-CoV-2 and chemical markers in campus dormitories in an evolving COVID-19 pandemic	10.1016/j.jhazmat.2022.130690
2022	Monteiro, S., et al.	A wastewater-based epidemiology tool for COVID-19 surveillance in Portugal	10.1016/j.scitotenv.2021.150264
2023	Montesinos-López, J. C., et al.	Bayesian sequential approach to monitor COVID-19 variants through test positivity rate from wastewater	10.1128/msystems.00018-23
2021	Mota, C. R., et al.	Assessing spatial distribution of COVID-19 prevalence in Brazil using decentralised sewage monitoring	10.1016/j.watres.2021.117388
2023	Mtetwa, H. N., et al.	Exploring the role of wastewater-based epidemiology in understanding tuberculosis burdens in Africa	10.1016/j.envres.2023.115911
2021	Mtetwa, H. N., et al.	Wastewater-Based Surveillance of Antibiotic Resistance Genes Associated with Tuberculosis Treatment Regimen in KwaZulu Natal, South Africa	10.3390/antibiotics10111362
2020	Nemudryi, A., et al.	Temporal Detection and Phylogenetic Assessment of SARS-CoV-2 in Municipal Wastewater	10.1016/j.xcrm.2020.100098
2022	Oh, C., et al.	Application of neighborhood-scale wastewater-based epidemiology in low COVID-19 incidence situations	10.1016/j.scitotenv.2022.158448
2022	Oloye, F. F., et al.	Rapid transition between SARS-CoV-2 variants of concern Delta and Omicron detected by monitoring municipal wastewater from three Canadian cities	10.1016/j.scitotenv.2022.156741
2021	Omori, R., et al.	Age-dependent association between SARS-CoV-2 cases reported by passive surveillance and viral load in wastewater	10.1016/j.scitotenv.2021.148442
2023	Ou, G., et al.	Wastewater surveillance and an automated robot: effectively tracking SARS-CoV-2 transmission in the post-epidemic era	10.1093/nsr/nwad089
2022	Padilla-Reyes, D. A., et al.	Acquired insights from the long-term surveillance of SARS-CoV-2 RNA for COVID-19 monitoring: The case of Monterrey Metropolitan Area (Mexico)	10.1016/j.envres.2022.112967
2022	Pang, X., et al.	Wastewater-Based Surveillance Is an Effective Tool for Trending COVID-19 Prevalence in Communities: A Study of 10 Major Communities for 17 Months in Alberta	10.1021/acsestwater.2c00143
2022	Pardo-Figueroa, B., et al.	Spatiotemporal Surveillance of SARS-CoV-2 in the Sewage of Three Major Urban Areas in Peru: Generating Valuable Data Where Clinical Testing Is Extremely Limited	10.1021/acsestwater.2c00065
2020	Peccia, J., et al.	Measurement of SARS-CoV-2 RNA in wastewater tracks community infection dynamics	10.1038/s41587-020-0684-z
2022	Pellegrinelli, L., et al.	Wastewater Surveillance Captured an Increase in Adenovirus Circulation in Milan (Italy) during the First Quarter of 2022	10.3390/v14112351
2023	Pellegrinelli, L., et al.	Wastewater-based epidemiology revealed in advance the increase of enterovirus circulation during the Covid-19 pandemic	10.1016/j.scitotenv.2023.166539
2023	Perez-Zabaleta, M., et al.	Long-term SARS-CoV-2 surveillance in the wastewater of Stockholm: What lessons can be learned from the Swedish perspective?	10.1016/j.scitotenv.2022.160023
2022	Pileggi, V., et al.	Quantitative Trend Analysis of SARS-CoV-2 RNA in Municipal Wastewater Exemplified with Sewershed-Specific COVID-19 Clinical Case Counts	10.1021/acsestwater.2c00058
2021	Pillay, L., et al.	Monitoring changes in COVID-19 infection using wastewater-based epidemiology: A South African perspective	10.1016/j.scitotenv.2021.147273
2022	Pillay, L., et al.	Potential and Challenges Encountered in the Application of Wastewater-Based Epidemiology as an Early Warning System for COVID-19 Infections in South	10.1021/acsestwater.2c00049
2021	Prado, T., et al.	Hepatitis A Outbreaks and Environmental Circulation of Genotype IA Strains in the São Paulo City, 2017-2018	10.1007/s12560-021-09497-7
2021	Prado, T., et al.	Wastewater-based epidemiology as a useful tool to track SARS-CoV-2 and support public health policies at municipal level in Brazil	10.1016/j.watres.2021.116810
2023	Rabe, A., et al.	Correlation between wastewater and COVID-19 case incidence rates in major California sewersheds across three variant periods	10.2166/wh.2023.173
2022	Radu, E., et al.	Emergence of SARS-CoV-2 Alpha lineage and its correlation with quantitative wastewater-based epidemiology data	10.1016/j.watres.2022.118257
2023	Rainey, A. L., et al.	A multistate assessment of population normalization factors for wastewater-based epidemiology of COVID-19	10.1371/journal.pone.0284370
2022	Rainey, A. L., et al.	Assessment of a mass balance equation for estimating community-level prevalence of COVID-19 using wastewater-based epidemiology in a mid-sized city	10.1038/s41598-022-21354-6
2022	Rainey, A. L., et al.	Wastewater surveillance for SARS-CoV-2 in a small coastal community: Effects of tourism on viral presence and variant identification among low prevalence populations	10.1016/j.envres.2021.112496
2022	Rasero, F. J. R., et al.	Associations between SARS-CoV-2 RNA concentrations in wastewater and COVID-19 rates in days after sampling in small urban areas of Seville: A time series study	10.1016/j.scitotenv.2021.150573
2023	Rector, A., et al.	Monitoring of SARS-CoV-2 concentration and circulation of variants of concern in wastewater of Leuven, Belgium	10.1002/jmv.28587
2021	Reeves, K., et al.	High-resolution within-sewer SARS-CoV-2 surveillance facilitates informed intervention	10.1016/j.watres.2021.117613
2023	Reyne, M. I., et al.	Detection of human adenovirus F41 in wastewater and its relationship to clinical cases of acute hepatitis of unknown aetiology	10.1016/j.scitotenv.2022.159579
2022	Reynolds, L. J., et al.	Coprostanol as a Population Biomarker for SARS-CoV-2 Wastewater Surveillance Studies	10.3390/w14020225
2022	Reynolds, L. J., et al.	SARS-CoV-2 variant trends in Ireland: Wastewater-based epidemiology and clinical surveillance	10.1016/j.scitotenv.2022.155828
2022	Robotto, A., et al.	Wastewater-based SARS-CoV-2 environmental monitoring for Piedmont, Italy	10.1016/j.envres.2021.111901
2023	Rogawski McQuade, E. T., et al.	Real-time sewage surveillance for SARS-CoV-2 in Dhaka, Bangladesh versus clinical COVID-19 surveillance: a longitudinal environmental surveillance study (December, 2019-December, 2021)	10.1016/s2666-5247(23)00010-1
2021	Róka, E., et al.	Ahead of the second wave: Early warning for COVID-19 by wastewater surveillance in Hungary	10.1016/j.scitotenv.2021.147398
2021	Rubio-Acero, R., et al.	Spatially resolved qualified sewage spot sampling to track SARS-CoV-2 dynamics in Munich-One year of experience	10.1016/j.scitotenv.2021.149031
2021	Rusiñol, M., et al.	Monitoring waves of the COVID-19 pandemic: Inferences from WWTPs of different sizes	10.1016/j.scitotenv.2021.147463
2023	Saingam, P., et al.	Wastewater surveillance of SARS-CoV-2 at intra-city level demonstrated high resolution in tracking COVID-19 and calibration using chemical indicators	10.1016/j.scitotenv.2023.161467
2022	Sakarovitch, C., et al.	Monitoring of SARS-CoV-2 in wastewater: what normalisation for improved understanding of epidemic trends?	10.2166/wh.2022.012
2022	Sangsanont, J., et al.	SARS-CoV-2 RNA surveillance in large to small centralized wastewater treatment plants preceding the third COVID-19 resurgence in Bangkok, Thailand	10.1016/j.scitotenv.2021.151169
2021	Saththasivam, J., et al.	COVID-19 (SARS-CoV-2) outbreak monitoring using wastewater-based epidemiology in Qatar	10.1016/j.scitotenv.2021.145608
2023	Schilmann, A., et al.	SARS-CoV-2 Wastewater Surveillance in Ten Cities from Mexico	10.3390/w15040799
2021	Scott, L. C., et al.	Targeted wastewater surveillance of SARS-CoV-2 on a university campus for COVID-19 outbreak detection and mitigation	10.1016/j.envres.2021.111374
2022	Sellers, S. C., et al.	Building-level wastewater surveillance of SARS-CoV-2 is associated with transmission and variant trends in a university setting	10.1016/j.envres.2022.114277
2023	Shrestha, S, et al.	Monitoring hand foot and mouth disease using long-term wastewater surveillance in Japan: Quantitative PCR assay development and application	10.1016/j.scitotenv.2023.165926
2023	Shrestha, S., et al.	Long-term SARS-CoV-2 surveillance in wastewater and estimation of COVID-19 cases: An application of wastewater-based epidemiology	10.1016/j.scitotenv.2023.165270
2022	Silva, C. S., et al.	Temporal dynamics of SARS-CoV-2 genome and detection of variants of concern in wastewater influent from two metropolitan areas in Arkansas	10.1016/j.scitotenv.2022.157546
2023	Sims, N., et al.	Antimicrobials and antimicrobial resistance genes in a one-year city metabolism longitudinal study using wastewater-based epidemiology	10.1016/j.envpol.2023.122020
2021	Song, Z. Q., et al.	Detection of SARS-CoV-2 in Wastewater: Community Variability, Temporal Dynamics, and Genotype Diversity	10.1021/acsestwater.1c00119
2022	Sosa-Hernández, J. E., et al.	Extensive Wastewater-Based Epidemiology as a Resourceful Tool for SARS-CoV-2 Surveillance in a Low-to-Middle-Income Country through a Successful Collaborative Quest: WBE, Mobility, and Clinical Tests	10.3390/w14121842
2021	Spurbeck, R. R., et al.	Feasibility of neighborhood and building scale wastewater-based genomic epidemiology for pathogen surveillance	10.1016/j.scitotenv.2021.147829
2022	Sweetapple, C., et al.	Building knowledge of university campus population dynamics to enhance near-to-source sewage surveillance for SARS-CoV-2 detection	10.1016/j.scitotenv.2021.150406
2023	Sweetapple, C., et al.	Dynamic population normalisation in wastewater-based epidemiology for improved understanding of the SARS-CoV-2 prevalence: a multi-site study	10.2166/wh.2023.318
2023	Swift, C. L., et al.	SARS-CoV-2 concentration in wastewater consistently predicts trends in COVID-19 case counts by at least two days across multiple WWTP scales	10.1016/j.envadv.2023.100347
2022	Teban-Man, A., et al.	Municipal Wastewaters Carry Important Carbapenemase Genes Independent of Hospital Input and Can Mirror Clinical Resistance Patterns	10.1128/spectrum.02711-21
2022	Tharak, A., et al.	Longitudinal and Long-Term Wastewater Surveillance for COVID-19: Infection Dynamics and Zoning of Urban Community	10.3390/ijerph19052697
2022	Thongpradit, S., et al.	A Simple Method to Detect SARS-CoV-2 in Wastewater at Low Virus Concentration	10.1155/2022/4867626
2022	Tiwari, A., et al.	Detection and quantification of SARS-CoV-2 RNA in wastewater influent in relation to reported COVID-19 incidence in Finland	10.1016/j.watres.2022.118220
2021	Tomasino, M. P., et al.	SARS-CoV-2 RNA detected in urban wastewater from Porto, Portugal: Method optimization and continuous 25-week monitoring	10.1016/j.scitotenv.2021.148467
2023	Toribio-Avedillo, D., et al.	Monitoring influenza and respiratory syncytial virus in wastewater. Beyond COVID-19	10.1016/j.scitotenv.2023.164495
2023	Triggiano, F., et al.	Wastewater-based Epidemiology and SARS-CoV-2: Variant Trends in the Apulia Region (Southern Italy) and Effect of Some Environmental Parameters	10.1007/s12560-023-09565-0
2023	Trigo-Tasende, N., et al.	Wastewater early warning system for SARS-CoV-2 outbreaks and variants in a Coruña, Spain	10.1007/s11356-023-27877-3
2022	Vadde, K. K., et al.	Assessment of Concentration, Recovery, and Normalization of SARS-CoV-2 RNA from Two Wastewater Treatment Plants in Texas and Correlation with COVID-19 Cases in the Community	10.1021/acsestwater.2c00054
2023	Valdivia-Carrera, C. A., et al.	Surveillance of SARS-CoV-2, rotavirus, norovirus genogroup II, and human adenovirus in wastewater as an epidemiological tool to anticipate outbreaks of COVID-19 and acute gastroenteritis in a city without a wastewater treatment plant in the Peruvian Highlands	10.1016/j.scitotenv.2023.167161
2022	Vallejo, J. A., et al.	Modeling the number of people infected with SARS-COV-2 from wastewater viral load in Northwest Spain	10.1016/j.scitotenv.2021.152334
2023	van Boven, M., et al.	Patterns of SARS-CoV-2 circulation revealed by a nationwide sewage surveillance programme, the Netherlands, August 2020 to February 2022	10.2807/1560-7917.Es.2023.28.25.2200700
2022	Verani, M., et al.	Calibration of Methods for SARS-CoV-2 Environmental Surveillance: A Case Study from Northwest Tuscany	10.3390/ijerph192416588
2022	Vo, V., et al.	Use of wastewater surveillance for early detection of Alpha and Epsilon SARS-CoV-2 variants of concern and estimation of overall COVID-19 infection burden	10.1016/j.scitotenv.2022.155410
2023	Wadi, V. S., et al.	Long-term study on wastewater SARS-CoV-2 surveillance across United Arab Emirates	10.1016/j.scitotenv.2023.163785
2023	Wang, H., et al.	Measures against COVID-19 affected the spread of human enteric viruses in a Swedish community, as found when monitoring wastewater	10.1016/j.scitotenv.2023.165012
2021	Wang, P., et al.	Long-term surveillance of wastewater SARS-CoV-2 in Los Angeles County	10.1039/d1ew00586c
2023	Wang, T., et al.	SARS-CoV-2 wastewater-based epidemiology in an enclosed compound: A 2.5-year survey to identify factors contributing to local community dissemination	10.1016/j.scitotenv.2023.162466
2023	Wang, Y., et al.	When case reporting becomes untenable: Can sewer networks tell us where COVID-19 transmission occurs?	10.1016/j.watres.2022.119516
2023	Wani, H. , et al.	Wastewater-Based Epidemiology of SARS-CoV-2: Assessing Prevalence and Correlation with Clinical Cases	10.1007/s12560-023-09555-2
2023	Wannigama, D. L., et al.	COVID-19 monitoring with sparse sampling of sewered and non-sewered wastewater in urban and rural communities	10.1016/j.isci.2023.107019
2023	Wannigama, D. L., et al.	Multiple traces of monkeypox detected in non-sewered wastewater with sparse sampling from a densely populated metropolitan area in Asia	10.1016/j.scitotenv.2022.159816
2022	Wartell, B. A., et al.	Relationship between SARS-CoV-2 in wastewater and clinical data from five wastewater sheds	10.1016/j.hazadv.2022.100159
2021	Wilder, M. L., et al.	Co-quantification of crAssphage increases confidence in wastewater-based epidemiology for SARS-CoV-2 in low prevalence areas	10.1016/j.wroa.2021.100100
2021	Wolfe, M. K., et al.	High-Frequency, High-Throughput Quantification of SARS-CoV-2 RNA in Wastewater Settled Solids at Eight Publicly Owned Treatment Works in Northern California Shows Strong Association with COVID-19 Incidence	10.1128/mSystems.00829-21
2021	Wolfe, M. K., et al.	Scaling of SARS-CoV-2 RNA in Settled Solids from Multiple Wastewater Treatment Plants to Compare Incidence Rates of Laboratory-Confirmed COVID-19 in Their Sewersheds	10.1021/acs.estlett.1c00184
2022	Wolfe, M. K., et al.	Wastewater-Based Detection of Two Influenza Outbreaks	10.1021/acs.estlett.2c00350
2023	Wolken, M., et al.	Wastewater surveillance of SARS-CoV-2 and influenza in preK-12 schools shows school, community, and citywide infections	10.1016/j.watres.2023.119648
2022	Wu, F., et al.	SARS-CoV-2 RNA concentrations in wastewater foreshadow dynamics and clinical presentation of new COVID-19 cases	10.1016/j.scitotenv.2021.150121
2021	Wu, F., et al.	Wastewater surveillance of SARS-CoV-2 across 40 U.S. states from February to June 2020	10.1016/j.watres.2021.117400
2021	Wurtz, N., et al.	Viral RNA in City Wastewater as a Key Indicator of COVID-19 Recrudescence and Containment Measures Effectiveness	10.3389/fmicb.2021.664477
2022	Wurtzer, S., et al.	First Detection of Monkeypox Virus Genome in Sewersheds in France: The Potential of Wastewater-Based Epidemiology for Monitoring Emerging Disease	10.1021/acs.estlett.2c00693
2022	Wurtzer, S., et al.	SARS-CoV-2 genome quantification in wastewaters at regional and city scale allows precise monitoring of the whole outbreaks dynamics and variants spreading in the population	10.1016/j.scitotenv.2021.152213
2022	Xie, Y., et al.	RNA in Municipal Wastewater Reveals Magnitudes of COVID-19 Outbreaks across Four Waves Driven by SARS-CoV-2 Variants of Concern	10.1021/acsestwater.1c00349
2021	Xu, X., et al.	The first case study of wastewater-based epidemiology of COVID-19 in Hong Kong	10.1016/j.scitotenv.2021.148000
2021	Yaniv, K., et al.	RT-qPCR assays for SARS-CoV-2 variants of concern in wastewater reveals compromised vaccination-induced immunity	10.1016/j.watres.2021.117808
2023	Yaniv, K., et al.	Wastewater monitoring of SARS-CoV-2 in on-grid, partially and fully off-grid Bedouin communities in Southern Israel	10.3389/frwa.2023.1136066
2021	Yeager, R., et al.	Wastewater Sample Site Selection to Estimate Geographically Resolved Community Prevalence of COVID-19: A Sampling Protocol Perspective	10.1029/2021gh000420
2022	Yu, A. T., et al.	Estimating Relative Abundance of 2 SARS-CoV-2 Variants through Wastewater Surveillance at 2 Large Metropolitan Sites, United States	10.3201/eid2805.212488
2023	Zafeiriadou, A., et al.	Wastewater surveillance of the most common circulating respiratory viruses in Athens: The impact of COVID-19 on their seasonality	10.1016/j.scitotenv.2023.166136
2022	Zambrana, W., et al.	SARS-CoV-2 RNA and N Antigen Quantification via Wastewater at the Campus Level, Building Cluster Level, and Individual-Building Level	10.1021/acsestwater.2c00050
2022	Zarza, E., et al.	Monitoring SARS-CoV-2 in the Wastewater and Rivers of Tapachula, a Migratory Hub in Southern Mexico	10.1007/s12560-022-09523-2
2022	Zdenkova, K., et al.	Monitoring COVID-19 spread in Prague local neighborhoods based on the presence of SARS-CoV-2 RNA in wastewater collected throughout the sewer network	10.1016/j.watres.2022.118343
2023	Zhan, Q. Y., et al.	Correlative Analysis of Wastewater Trends with Clinical Cases and Hospitalizations through Five Dominant Variant Waves of COVID-19	10.1021/acsestwater.3c00032
2022	Zhan, Q., et al.	Relationships between SARS-CoV-2 in Wastewater and COVID-19 Clinical Cases and Hospitalizations, with and without Normalization against Indicators of Human Waste	10.1021/acsestwater.2c00045
2022	Zhang, S., et al.	Analytical performance comparison of four SARS-CoV-2 RT-qPCR primer-probe sets for wastewater samples	10.1016/j.scitotenv.2021.150572
2022	Zhao, L., et al.	Five-week warning of COVID-19 peaks prior to the Omicron surge in Detroit, Michigan using wastewater surveillance	10.1016/j.scitotenv.2022.157040
2023	Zhao, L., et al.	Targeting a free viral fraction enhances the early alert potential of wastewater surveillance for SARS-CoV-2: a methods comparison spanning the transition between delta and omicron variants in a large urban center	10.3389/fpubh.2023.1140441
2023	Zheng, X., et al.	Development and application of influenza virus wastewater surveillance in Hong Kong	10.1016/j.watres.2023.120594
2022	Zheng, X., et al.	Quantification of SARS-CoV-2 RNA in wastewater treatment plants mirrors the pandemic trend in Hong Kong	10.1016/j.scitotenv.2022.157121

## Sheet: Table S2
Control type	Control name	Control Type - Figure	Count
Endogenous	PMMoV	PMMoV	57
Endogenous	E. coli	E. coli	3
Endogenous	human polyomavirus	human polyomavirus	1
Endogenous	Crassphage	Crassphage	14
Endogenous	RNase P	RNase P	2
Endogenous	HF183	HF183	2
Endogenous	Bacteroides rRNA	Bacteroides rRNA	1
Endogenous	human 18S rRNA	human 18S rRNA	1
Endogenous	unknown	unknown	1
Endogenous	F+ bacteriophage/F specific phage	F+ bacteriophage/F specific phage	3
Endogenous	Enterococcus	Enterococcus	1
Exogenous	Bovine RSV	Bovine RSV	10
Exogenous	BCoV	BCoV	36
Exogenous	MS2	MS2	16
Exogenous	MHV/murine Hepatitis virus	Animal virus non-CoV	5
Exogenous	unknown	Miscellaneous	1
Exogenous	avian coronavirus	Animal CoV	1
Exogenous	artificial/synthetic armored viral particles	Miscellaneous	3
Exogenous	sample processing control in cepheid cartridges	Miscellaneous	1
Exogenous	mengovirus	Animal virus non-CoV	7
Exogenous	OC43	Human CoV	3
Exogenous	armored HepG	Miscellaneous	3
Exogenous	IDEXX internal extraction control	Miscellaneous	1
Exogenous	animal coronavirus	Animal CoV	1
Exogenous	murine NoV	Animal virus non-CoV	5
Exogenous	generic recover control	Miscellaneous	1
Exogenous	internal process control	Miscellaneous	1
Exogenous	inhibition control	Miscellaneous	2
Exogenous	porcine reproductive and respiratory syndrome virus (PRRSv)	Animal virus non-CoV	1
Exogenous	CoV 229E	Human CoV	3
Exogenous	Phi6	Phi6	10
Exogenous	Heat inactivated SARS-CoV-2	Human CoV	3
Exogenous	salmon DNA	Miscellaneous	1
Exogenous	PEDV-Porcine epidemic diarrhea virus	Animal virus non-CoV	1
Exogenous	Tulane Virus	Animal virus non-CoV	1
Exogenous	non-enveloped RNA bacteriophage	Human virus non-CoV	1
Exogenous	HF183	Miscellaneous	1
Exogenous	lentiviral vectors	Miscellaneous	1
Exogenous	TGEV-Transmissible gastroenteritis virus (cov)	Animal CoV	1
Exogenous	equine arteritis virus	Animal virus non-CoV	1
Exogenous	adenovirus 42	Human virus non-CoV	1
Exogenous	HIV	Human virus non-CoV	1
Exogenous	murine CoV	Animal CoV	1
Chemical	Ammonium	Ammonium	1
Chemical	5-Hydroxyindoleacetic acid (5-HIAA)	5-HIAA	1
