# Supplementary material
Source: Royal Society of Chemistry journal article supplement (doi:10.1039/d5ew01049g)
Supplement: d5ew01049g2.pdf [file d5ew01049g2.pdf]

- Pubmed:
  - (("Wastewater-Based Epidemiological Monitoring"[MeSH Terms] OR "wastewater surveillance"[Title/Abstract] OR "wastewater based epidemiology"[Title/Abstract] OR "wastewater-based surveillance"[Title/Abstract] OR ("WBS"[Title/Abstract] NOT "williams-beuren syndrome"[Title/Abstract]) AND "wastewater"[Title/Abstract])) AND "english"[Language]) AND (english[Filter])
  - Results: 1,383
- Web of Science
  - (TS=("wastewater surveillance" OR "wastewater based epidemiology" OR "wastewater based surveillance" OR "WBE")) OR TS=("WBS" AND "wastewater") NOT "williams-beuren syndrome" )
  - Filter by English language articles
  - Results: 1,814
